# Supplementary material for: The Changing Biogeography of the Ligurian Sea: Seawater Warming and Further Records of Southern Species
Source: MDPI journal article supplement (doi:10.3390/d16030159), 2024-03-04
Supplement: s1 [file s1]

# The Changing Biogeography of the Ligurian Sea: Seawater Warming and Further Records of Southern Species

## Supplementary Materials

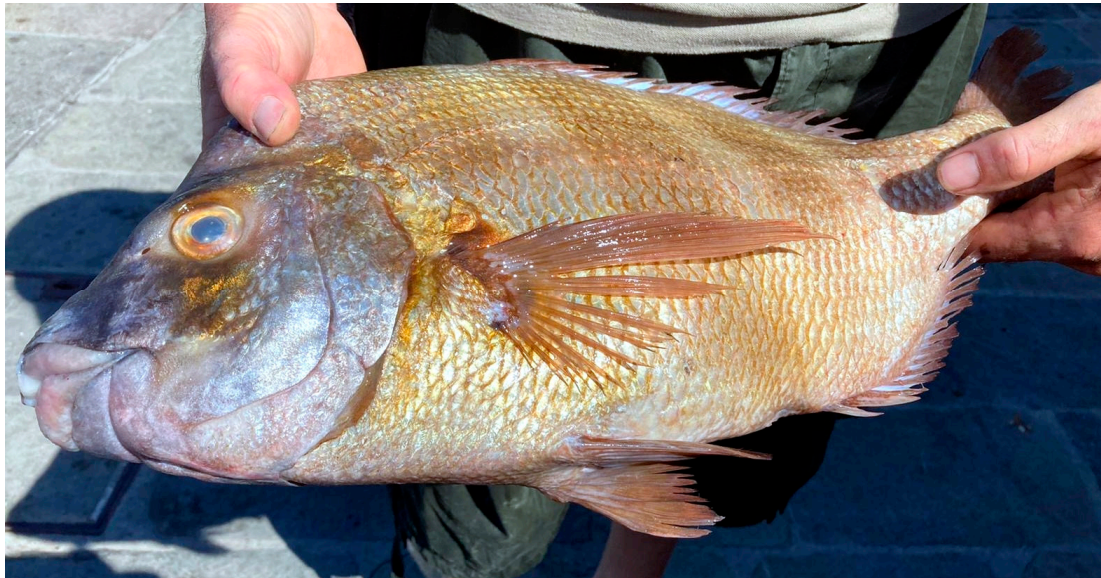

**Figure S1.** *Diplodus cervinus*, of 32 cm total length, caught off Camogli in July 2020 (© Sara Giovanna Guaraglia);.

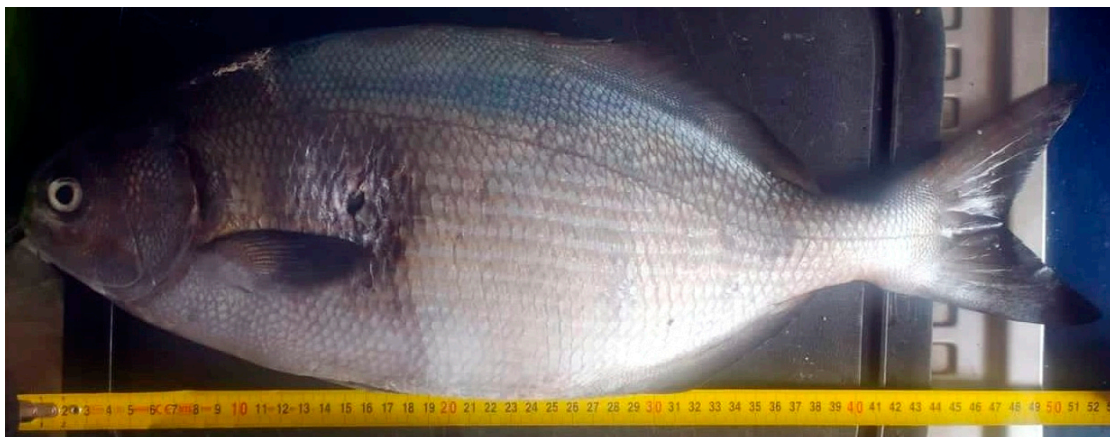

**Figure S2.** *Kyphosus vaigiensis*, of 2 kg weight, 52 cm total length, and 47.5 cm fork length, spearfished in September 2022 at a 7 m depth off the breakwater of the Port of Genoa (© Stefano Castronovo);.



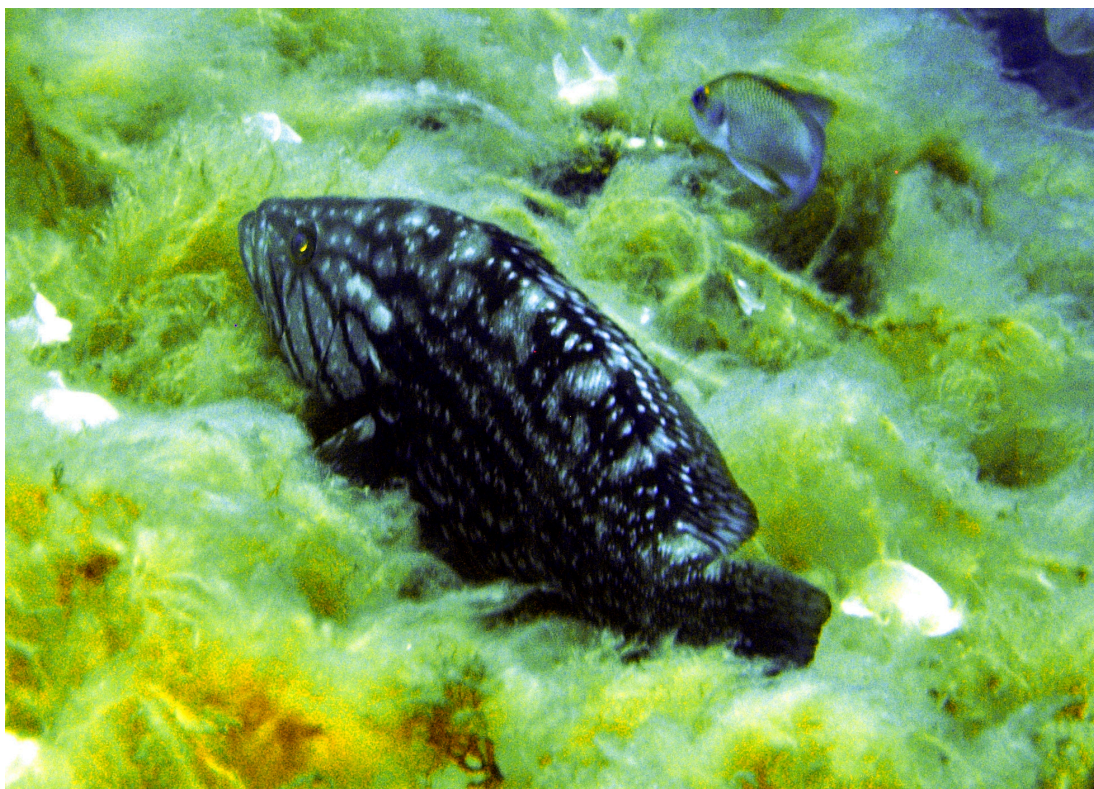

**Figure S3.** *Mycteroperca rubra* resting on the top of the Isuela Shoal, Marine Protected Area of Portofino, in June 2020 (© Lorenzo Merotto).

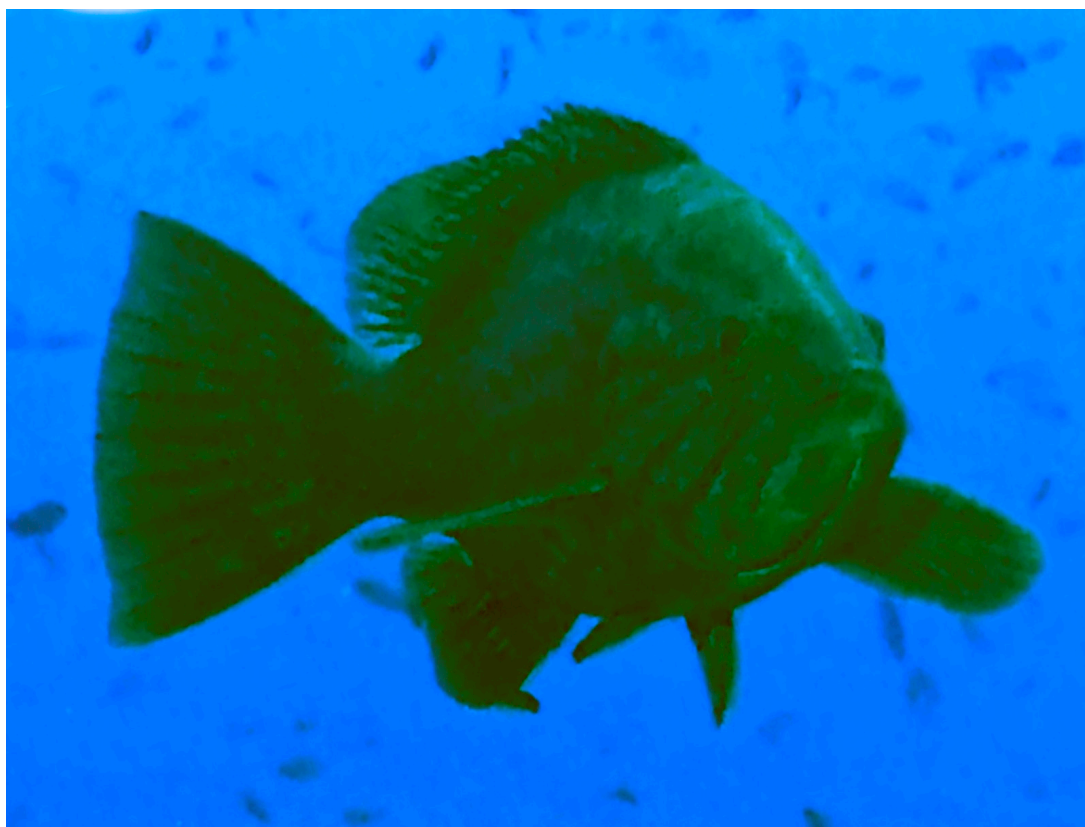

**Figure S4.** *Mycteroperca rubra* in mid-water at Secca Gonzatti, Marine Protected Area of Portofino, in July 2021 (© Giuseppe Galletta).

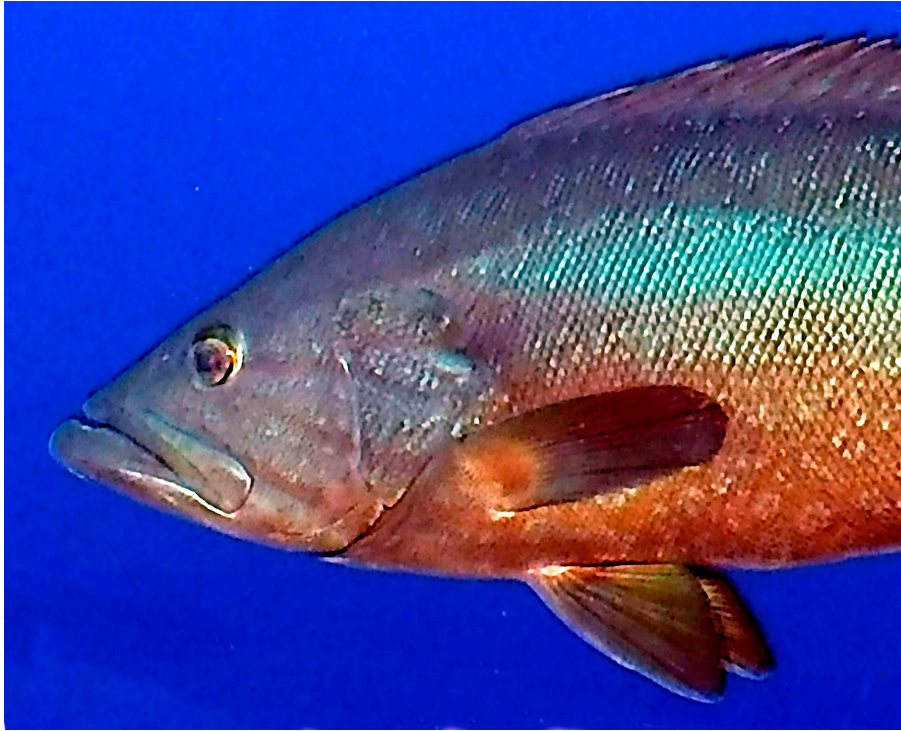

**Figure S5.** Close-up of *Mycteroperca rubra* at the Isuela Shoal, Marine Protected Area of Portofino, in June 2021 (© Giuseppe Galletta).
